# Supplementary material for: Antiviral Activity of Silver, Copper Oxide and Zinc Oxide Nanoparticle Coatings against SARS-CoV-2
Source: MDPI journal article supplement (doi:10.3390/nano11051312), 2021-05-17
Supplement: s1 [file s1]

# Supplementary Information

## Antiviral activity of silver, copper oxide and zinc oxide nanoparticle coatings against SARS-CoV-2

Padryk Merkl<sup>#</sup>, Siwen Long<sup>#</sup>, Gerald M. McInerney<sup>\*</sup>, and Georgios A. Sotiriou<sup>\*</sup>

Department of Microbiology, Tumor and Cell Biology, Karolinska Institutet, SE-17177 Stockholm, Sweden.

<sup>#</sup>These authors contributed equally

<sup>\*</sup>Corresponding authors E-mails: [georgios.sotiriou@ki.se](mailto:georgios.sotiriou@ki.se) and [gerald.mcinerney@ki.se](mailto:gerald.mcinerney@ki.se)

Table S1. p-values of data in Fig. 4a.

| p-values of data vs control in Fig. 4a |        |        |         |
|----------------------------------------|--------|--------|---------|
|                                        | 5 min  | 30 min | 120 min |
| ZnO                                    | 0.4792 | 0.2061 | 0.6697  |
| CuO                                    | 0.3068 | 0.008  | 0.2773  |
| Ag                                     | 0.0251 | 0.0003 | 0.166   |

120 min Incubation

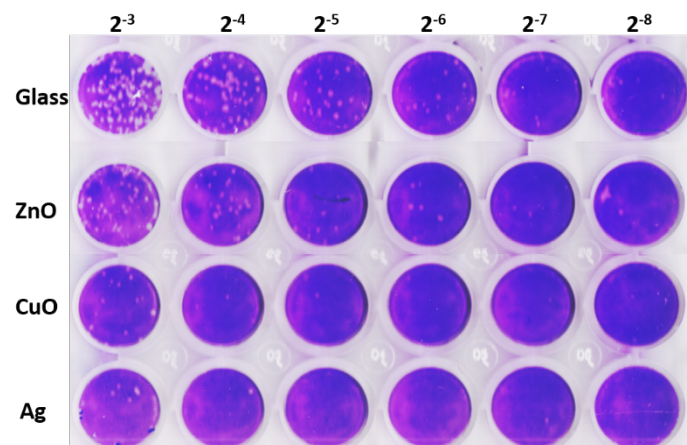

Figure S1. Representative photograph of the plaque quantification assay for the data presented in Fig 4A and 4B.
